# Supplementary material for: Stearoyl-CoA desaturase 1 expression is downregulated in liver and udder during E. coli mastitis through enhanced expression of repressive C/EBP factors and reduced expression of the inducer SREBP1A
Source: PubMed Central journal article supplement (PMC4955114; doi:10.1186/s12867-016-0069-5), 2016-07-20

**Additional file 2: Supplementary Figures**

**Supplementary Figure S 1:** DNA sequence alignment of the SCD1 promoter from cattle and human.

|        |       |                                                                  |                           |
|--------|-------|------------------------------------------------------------------|---------------------------|
|        |       | <b>WT_PL</b><br>└─┬─>                                            |                           |
| Bovine | -1767 | GGAGCAACACCTGCCCAGACTTCTCTCCACAAACATGCTGAGGGCTTCTGAGCCGTGAT      |                           |
| Human  |       | GT GAC AC TA T G G ---- CA TA G A C                              |                           |
| Bovine | -1707 | GAGAC-AGCTGTCTGTATCTAAAAACATCTAGTCTCATTCAAAACTTTTGCA\ . . . . .\ |                           |
| Human  |       | TG TG CAC G T C TG G CA \ . . . . .\                             |                           |
| Bovine | -1168 | CTACCTACCTCACAGGGCCACA-AGTTAAGAATCAAATGAAATGATTCTTGTGGATTGGC     | NFY (-)                   |
| Human  |       | G C C T G --- GC T C GA C A                                      |                           |
| Bovine | -1109 | TTG-----CAATACCTTTTGGCTACTCTTGCTGCACTTACAAGTACTTTCTCTCT          | <b>ScaI</b>               |
| Human  |       | CAGTAATAATT GCCA T AT C A C CC G                                 |                           |
| Bovine | -1060 | GCTTCTGAGTGAAAGCAC--GTCTGTCTTTCTCCACGAAATGGCCTTTCC-CAACGAAG      | NF-κB (+) C/EBP (-)       |
| Human  |       | G G A AT A -G CTG -----G A A                                     |                           |
| Bovine | -1003 | GCAATTCCAATAACAACGACCCGACGTTCT----AATCTCCAAACATCCCGC\ . . . . .\ | NF-κB (+) C/EBP (-)       |
| Human  |       | --- TT A T C AG GAAG \ . . . . .\                                |                           |
| Bovine | -361  | AGAAGCCGAG---GAGAAAGGGAGGGGAGGGGTAGTGAGGAGCTCGCGGCAGAGCGAACA     |                           |
| Human  |       | T AAG CA G C G A                                                 |                           |
| Bovine | -304  | GCAGATTGCGCCGAGCCAATGCAACGGCAGGACGAGGTGGCACCAAATTCCTTCGGCC       | SREBP (+) NFY (+) NF1 (+) |
| Human  |       |                                                                  |                           |
| Bovine | -244  | AATCACGCGCCAGAGTCTACAGAAGCC-CATTAGCATTTCCTCCAGGGGCAGGGGCAGAGG    | NFY (+) AP2 (-) SP1 (+)   |
| Human  |       | A G T T A G                                                      |                           |
| Bovine | -185  | CAGGGGCTGCGGCGGCCAAGCCGCGGTGT--GTGT--GCAGCATCCAGTTCTTGCTTCTT     |                           |
| Human  |       | A C - T -----T T CG CG CCG GCC G G                               |                           |
| Bovine | -129  | CGGCCCCCAGCACGCCTCGGCGCTCTGTCTCCTCCCCTCTCCCGCCCATGC-----         | SP1 (-)                   |
| Human  |       | T G - GA - - T A CTCCACGCG                                       |                           |
| Bovine | -78   | GGATCTCCACGGTGAACCAACTCTGCGCACTTTGCCCTTGTGGCAACGAATAAAAAGA       | PPRE (-) NF1 (+)          |
| Human  |       | C G G - CC GT CT GC G G G                                        |                           |
| Bovine | -18   | GGTC TGAGGAAATACGGGACACAGT                                       | C/EBP (+) +1 TSP          |
| Human  |       | G C GGT                                                          |                           |

The tsp, as found in this study is indicated, together with binding sites for selected transcription factors on the +/ or – strand are indicated. Nucleotides exchanged in the human sequence are given below the bovine sequence. White letters with underlay indicate terminal nucleotides of area found to be absolutely necessary for functioning of the promoter; red underlay, cattle [29]; black underlay, human [31].

## Supplementary figure S 2

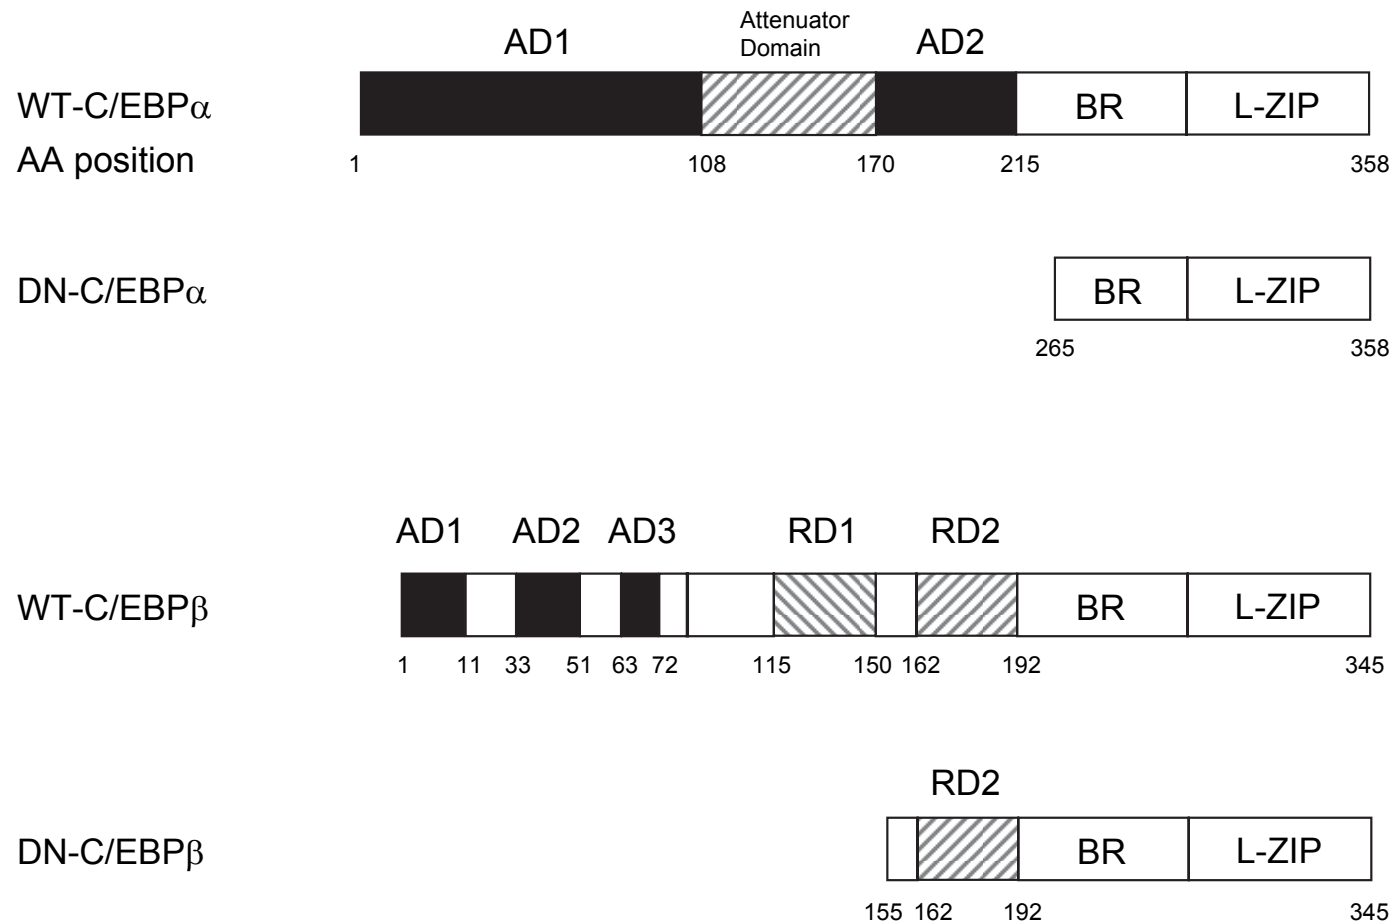

AD, RD, activator or repressive domains, respectively; BR, DNA-binding region; L-ZIP, leucin zipper for factor dimerization.

Construction of the DN-factors from cattle has been described [40].

Figure has been adopted and modified from Williamson et al., 1998, *Vet Immunol Immunopathol* 129:36-48. AA-positions denoting the domain boundaries have been taken from the latter reference.

# HepG2

# MAC-T

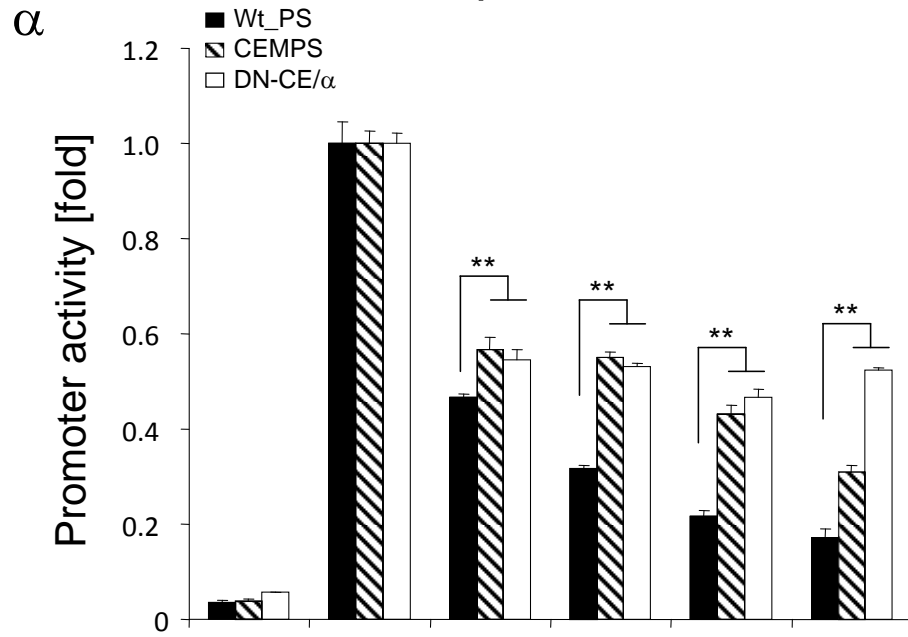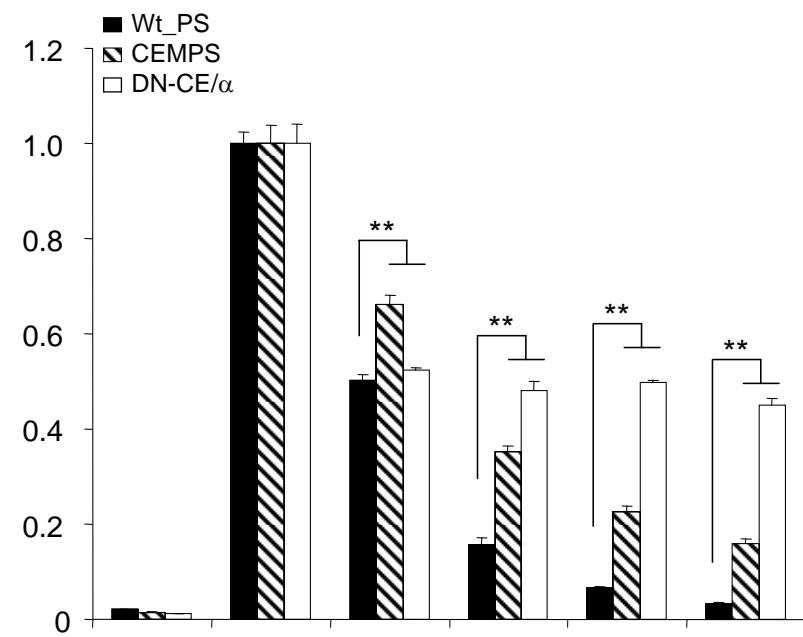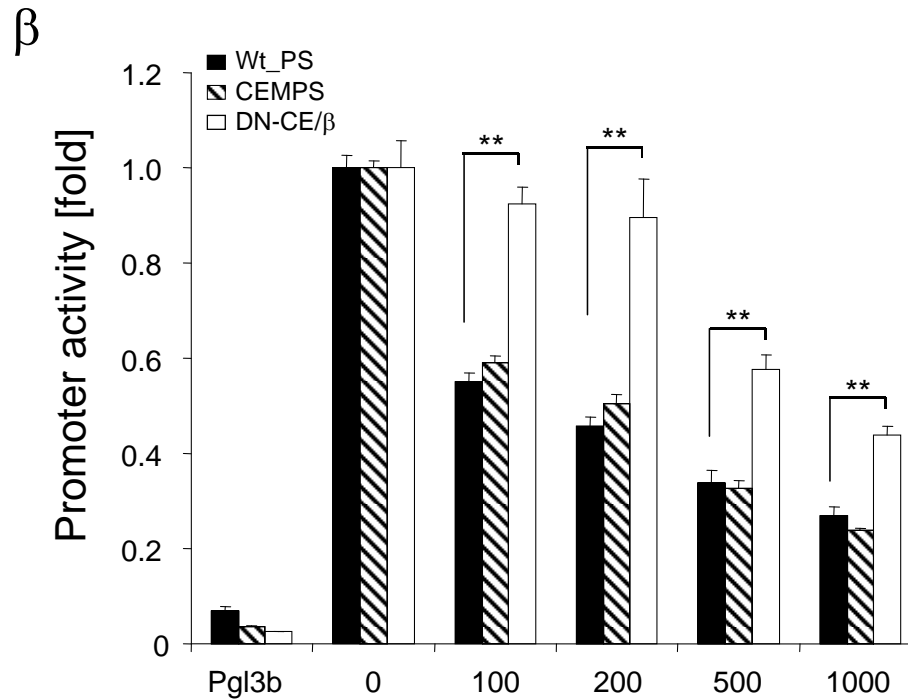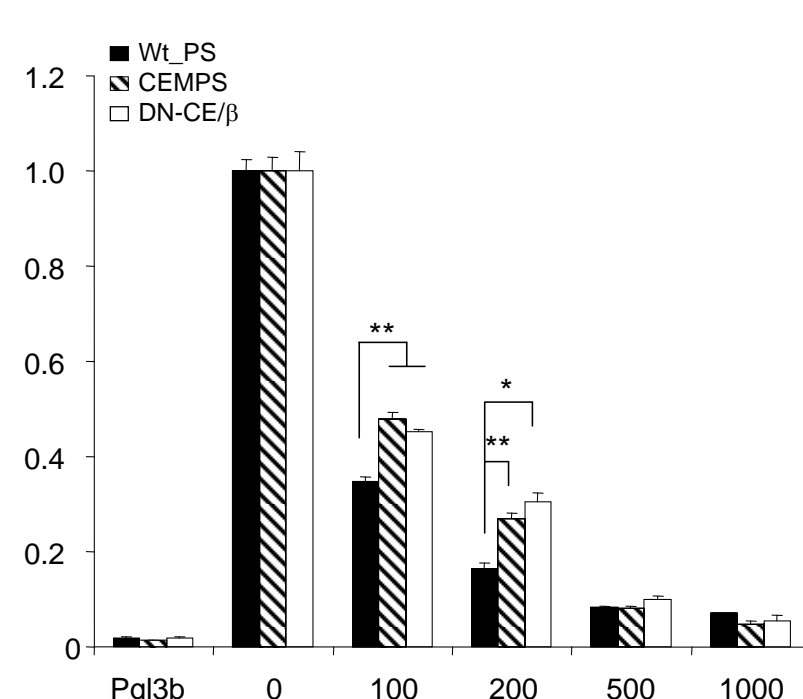

Supplement: 12867_2016_69_MOESM2_ESM.pdf [file 12867_2016_69_MOESM2_ESM.pdf]
