# Supplementary material for: Stearoyl-CoA desaturase 1 expression is downregulated in liver and udder during E. coli mastitis through enhanced expression of repressive C/EBP factors and reduced expression of the inducer SREBP1A
Source: PubMed Central journal article supplement (PMC4955114; doi:10.1186/s12867-016-0069-5), 2016-07-20
Supplement: 12867_2016_69_MOESM1_ESM.pdf [file 12867_2016_69_MOESM1_ESM.pdf]

**Additional file 1**, Supplementary table S1: Stability of the expression levels of reference genes

| <b>Tissue</b> | <b>Gene</b>    | <b>GS</b>      | <b>Infected</b> | <b>Fold<sup>a</sup></b> | <b>p<sup>b</sup></b> |
|---------------|----------------|----------------|-----------------|-------------------------|----------------------|
| Liver         | <i>SFRS4</i>   | 9991 ± 435     | 9174 ± 763      | 0.92                    | 0.40                 |
|               | <i>ACTB</i>    | 240189 ± 14225 | 413546 ± 61026  | 1.72                    | 0.055                |
|               | <i>CLIC1</i>   | 5029 ± 579     | 8788 ± 1022     | 1.75                    | 0.02                 |
|               | <i>RPLA35A</i> | 250703 ± 3446  | 425551 ± 61529  | 1.70                    | 0.03                 |
| Udder         | <i>SFRS4</i>   | 7143 ± 922     | 9591 ± 632      | 1.34                    | 0.06                 |
|               | <i>ACTB</i>    | 45225 ± 1775   | 150757 ± 15931  | 3.33                    | 0.00                 |
|               | <i>CLIC1</i>   | 11184 ± 2106   | 128123 ± 16900  | 11.4                    | 0.00                 |

Values are mean values (± S.E.M.) of copy numbers, relative to the same amount of cDNA input in every sample. GS (Gold standard), n=6; Infected (*E. coli*, 24 h), n=5; <sup>a</sup>Fold, fold change of mean values (infected vs GS samples); <sup>b</sup>P value of difference (Student's t-test).

**Additional file 1; Supplementary Table S2A: Primers for real time quantitative PCR.**

| Gene                 | Accession#     | cDNA generation (5'-)     | Forward primer (5'-)   | Reverse primer (5'-)      | Amplicon (bp) |
|----------------------|----------------|---------------------------|------------------------|---------------------------|---------------|
| SCD1                 | NM_173959.4    | GCAGCAAGTGGGCCGGCAT       | CACGCAAAGCAGGCTCAGGA   | GCATCTGGGCTCTCAGACACT     | 110           |
| ACACA                | NM_174224.2    | TTTCAAGAGAAGTTCTGGGAGCT   | GTTCTCATTGCCAACAATGGCA | CAGCCAGCCCAAAGCTGCTTGAC   | 266           |
| C/EBP $\alpha$       | NM_176784.2    | GCAGTTGCCCATGGCCTTG       | GCAAGAGCCGGGACAAGG     | TCGGGCAGCTGACGGAAG        | 151           |
| C/EBP $\beta$        | NM_176788.1    | 5'-TTTTTTTTTTTTTTTTTTTTTN | GACAAGCACAGCGACGAGTACA | CGACAGTTGCTCCACCTTCTTC    | 198           |
| C/EBP $\delta$       | NM_174267.2    | 5'-TTTTTTTTTTTTTTTTTTTTTN | AACCCGCTGCCTTCTACGA    | CCCGCTTTGTGGTTGCTGT       | 152           |
| NFYA                 | NM_001014956.1 | 5'-TTTTTTTTTTTTTTTTTTTTTN | AGGCGGACGATTTTTCTCT    | AGTGGGAAACTGTGAGGAAT      | 150           |
| SREBP1a              | NM_001113302.1 | CAGCTTCTGCCGCTGCCAGA      | GCCAGCCTGGCAATGTGTGA   | CAGGTACACAGGAGCAGCT       | 103           |
| NF- $\kappa$ B (p65) | NM_001080242.2 | AAGTTGATGGTGCTGAGAGATG    | TTTTTCACAAGCTGACGTGCAC | GCTCTGAAGGTCTCGTACGT      | 211           |
| NF- $\kappa$ B (p50) | NM_001076409.1 | CACTGTCCCCGTTCTCATC       | GTCAAACCTCCAGAATGGCAGA | GAAATCCTCTCTGTTTAGGTTGCTC | 179           |
| SFRS4                | NM_001101231.1 | CTTGTGGGCATCTGCATAAGTC    | ATGGCAGTTACGGTTCTGGAC  | CCTGCCTGACGCATATAATCC     | 156           |

The source files used to derive the primers are indicated (accession#).

**Additional file 1;** Supplementary Table S2B: Primers for plasmid constructs, chromatin assay and 5'RACE experiment.

| Primer name | Sequence (5'-3') <sup>*,#</sup>                      | Applications                      |
|-------------|------------------------------------------------------|-----------------------------------|
| pf1         | AGCT <u>GGTACCG</u> GAGCAACACCTGCCAGAC               | WT promoter construct (PL)        |
| pf2         | AGCT <u>GGTACCG</u> TGACCATTGGCTGAACCTCT             | WT promoter construct (PS)        |
| pr2         | AGCT <u>AAGCTT</u> GCATCTGGGCTCTCAGACACT             | WT promoter construct (PL and PS) |
| mpf3        | CGAAATGGCCAGTTATG <u>CCGAAGGCAATTCCAAACAACG</u>      | Mutation for distal site          |
| mpr4        | TGCCTTCGGCATAACTGGCCATTCGTGGAGAAAGGAC                | Mutation for distal site          |
| mpf5        | CGAATAAAAGAGGACATATG <u>TGTTACGGGACACAGTCACCCCCT</u> | Mutation for proximal site        |
| mpr6        | CGTAACACATATGTCCTCTTTTATTCGTTCCAACAAG                | Mutation for proximal site        |
| pfA         | GGGAAAGGCCATTTTCGTGGAG                               | CHART-PCR for area A              |
| prA         | ATTGATTGGCTGCTGTGACCAT                               | CHART-PCR for area A              |
| pfB         | GTGCCATCCATTTGCGAATTG                                | CHART-PCR for area B              |
| prB         | GGCTCGGCGCAATCTGCTGT                                 | CHART-PCR for area B              |
| pfC         | CTCCCACGGTGAACCAACTCT                                | CHART-PCR for area C              |
| prC         | GCATCTGGGCTCTCAGACACT                                | CHART-PCR for area C              |
| Rpf1        | GGACACTGACATGGACTGAAGGAGTA                           | 5'RACE nested                     |
| Rpf2        | CGACTGGAGCACGAGGACTGA                                | 5'RACE                            |
| Rpr1        | GGCTCCCAAGTGTAACAGAGAC                               | 5'RACE nested                     |
| Rpr2        | TGCAGGTGGGGATCAATGTGA                                | 5'RACE                            |

\*, Mutated nucleotides are shown as bold letters.

#, Underlined are artificially introduced restriction site.

**Additional file 1**, Supplementary Table S3A: mRNA levels in Tissues.

| TFs            | Liver         |                 |                             | MG             |                  |                     |                             |
|----------------|---------------|-----------------|-----------------------------|----------------|------------------|---------------------|-----------------------------|
|                | GS            | Infected        | fold<br>inductio<br>n vs GS | GS             | Neighbo<br>r     | Infected            | fold<br>inductio<br>n vs GS |
| CEBP- $\beta$  | 49 $\pm$ 5    | 164 $\pm$ 41*   | 3.32                        | 36 $\pm$ 6     | 59 $\pm$ 7       | 301 $\pm$ 30**      | 8.36                        |
| CEBP- $\alpha$ | 832 $\pm$ 96  | 1509 $\pm$ 186* | 1.81                        | 85 $\pm$ 6     | 160 $\pm$ 10     | 245 $\pm$ 38**      | 2.88                        |
| CEBP- $\delta$ | 51 $\pm$ 6    | 79 $\pm$ 7*     | 1.55                        | 16 $\pm$ 4     | 43 $\pm$ 9       | 163 $\pm$ 26**      | 10.18                       |
| NFYA           | 409 $\pm$ 18  | 578 $\pm$ 64*   | 1.41                        | 461 $\pm$ 65   | 629 $\pm$ 39     | 774 $\pm$ 63**      | 1.68                        |
| SREBP1<br>a    | 881 $\pm$ 143 | 505 $\pm$ 39*   | 0.57                        | 2538 $\pm$ 635 | 979 $\pm$ 122    | 880 $\pm$ 102*      | 0.35                        |
| p65            | 115 $\pm$ 5   | 215 $\pm$ 27**  | 1.86                        | 117 $\pm$ 16   | 196 $\pm$ 11     | 242 $\pm$ 19**      | 2.07                        |
| p50            | 655 $\pm$ 35  | 939 $\pm$ 81*   | 1.43                        | 1956 $\pm$ 302 | 2822 $\pm$<br>89 | 5962 $\pm$<br>463** | 3.05                        |

Values are mean ( $\pm$  S.E.M.) copy numbers relative to 75 ng of total RNA used as input for cDNA generation; MG, mammary gland; TF, transcription factor; GS or Infected, tissues gold standard or infected cows; Neighbor, sterile udder quarter neighboring an infected one.

**Additional file 3**, Supplementary Table S3B: mRNA levels in model cells.

| TF              | HepG2          | MAC-T             |
|-----------------|----------------|-------------------|
|                 | Mean $\pm$ SEM | Mean $\pm$<br>SEM |
| SREBP1a         | 21 $\pm$ 9     | 453 $\pm$ 51      |
| C/EBP- $\alpha$ | 41 $\pm$ 6     | 173 $\pm$ 6       |
| C/EBP- $\beta$  | 160 $\pm$ 10   | 76 $\pm$ 3        |
